# Supplementary material
Source: PubMed Central journal article supplement (PMC5318236)
Supplement: NIHMS824168-supplement.pdf [file NIHMS824168-supplement.pdf]

Appendix 1. Demographics of the patients by cohort and site.

|                                       | Hong Kong              |                       | India                  |                        |
|---------------------------------------|------------------------|-----------------------|------------------------|------------------------|
|                                       | TAHOD-LITE<br>n=524    | TAHOD<br>n=270        | TAHOD-LITE<br>n=8263   | TAHOD<br>n=350         |
|                                       | n (%)                  | n (%)                 | n (%)                  | n (%)                  |
| <b>Year of ART initiation</b>         |                        |                       |                        |                        |
| 2003-05                               | 107 (20)               | 47 (17)               | 2046 (25)              | 119 (34)               |
| 2006-09                               | 118 (23)               | 154 (57)              | 3379 (41)              | 104 (30)               |
| 2010-13                               | 299 (57)               | 69 (26)               | 2838 (34)              | 127 (36)               |
| <b>Age</b>                            |                        |                       |                        |                        |
| ≤30                                   | 112 (21)               | 37 (14)               | 1934 (23)              | 81 (23)                |
| 31-40                                 | 180 (34)               | 101 (37)              | 4104 (50)              | 188 (54)               |
| 41-50                                 | 135 (26)               | 85 (31)               | 1642 (20)              | 68 (19)                |
| 51+                                   | 97 (19)                | 47 (17)               | 583 (7)                | 13 (4)                 |
| Median [IQR]                          | 39 [32, 47]            | 40 [34, 48]           | 36 [31, 41]            | 35 [31, 40]            |
| <b>Sex</b>                            |                        |                       |                        |                        |
| Male                                  | 414 (79)               | 231 (86)              | 5660 (68)              | 236 (67)               |
| Female                                | 109 (21)               | 39 (14)               | 2595 (31)              | 114 (33)               |
| Transgender                           | 1 (<0.2)               | 0 (-)                 | 8 (<0.1)               | 0 (-)                  |
| <b>Mode of HIV exposure</b>           |                        |                       |                        |                        |
| Heterosexual                          | 217 (41)               | 119 (44)              | 7667 (93)              | 339 (97)               |
| Homosexual                            | 213 (41)               | 116 (43)              | 41 (<0.5)              | 1 (<0.3)               |
| Injecting drug user                   | 25 (5)                 | 4 (1)                 | 52 (1)                 | 1 (<0.3)               |
| Other/Unknown                         | 69 (13)                | 31 (11)               | 503 (6)                | 9 (3)                  |
| <b>HCV (ever)</b>                     |                        |                       |                        |                        |
| Positive                              | 41 (8)                 | 10 (4)                | 56 (1)                 | 3 (1)                  |
| Negative                              | 441 (84)               | 250 (92)              | 1188 (14)              | 126 (36)               |
| Not tested                            | 42 (8)                 | 10 (4)                | 7019 (85)              | 221 (63)               |
| <b>HBV (ever)</b>                     |                        |                       |                        |                        |
| Positive                              | 49 (9)                 | 27 (10)               | 136 (2)                | 13 (4)                 |
| Negative                              | 442 (85)               | 235 (87)              | 1833 (22)              | 230 (66)               |
| Not tested                            | 33 (6)                 | 8 (3)                 | 6294 (76)              | 107 (30)               |
| <b>Pre-ART CD4 (cells/μL)</b>         |                        |                       |                        |                        |
| ≤50                                   | 175 (33)               | 87 (32)               | 1058 (13)              | 41 (12)                |
| 51-100                                | 70 (13)                | 38 (14)               | 1230 (15)              | 44 (13)                |
| 101-200                               | 75 (14)                | 63 (23)               | 2240 (27)              | 108 (31)               |
| >200                                  | 164 (31)               | 80 (30)               | 2007 (24)              | 138 (39)               |
| Not tested                            | 40 (8)                 | 2 (1)                 | 1728 (21)              | 19 (5)                 |
| Median [IQR]                          | 98 [30, 259]           | 116 [35, 215]         | 146 [72, 223]          | 178 [95, 255]          |
| <b>Pre-ART viral load (copies/mL)</b> |                        |                       |                        |                        |
| ≤10 <sup>5</sup>                      | 189 (36)               | 135 (50)              | 374 (4)                | 88 (25)                |
| >10 <sup>5</sup>                      | 260 (50)               | 121 (45)              | 467 (6)                | 102 (29)               |
| Not tested                            | 75 (14)                | 14 (5)                | 7422 (90)              | 160 (46)               |
| Median [IQR]                          | 134750 [46000, 390687] | 94675 [34067, 252441] | 129098 [29600, 406339] | 114431 [30746, 411000] |
| <b>First ART regimen</b>              |                        |                       |                        |                        |
| NRTI+NNRTI                            | 385 (73)               | 221 (82)              | 8015 (97)              | 341 (97)               |
| NRTI+PI                               | 132 (25)               | 44 (16)               | 228 (3)                | 7 (2)                  |
| Other                                 | 7 (1)                  | 5 (2)                 | 20 (<0.2)              | 2 (1)                  |
| <b>Previous mono/dual therapy</b>     |                        |                       |                        |                        |
| No                                    | 491 (94)               | 254 (94)              | 7873 (95)              | 331 (95)               |
| Yes                                   | 33 (6)                 | 16 (6)                | 390 (5)                | 19 (5)                 |

**Appendix 1. Demographics of the patients by cohort and site.**

|                                       | Indonesia           |                |                |                 | Singapore            |                 |                |                 |
|---------------------------------------|---------------------|----------------|----------------|-----------------|----------------------|-----------------|----------------|-----------------|
|                                       | TAHOD-LITE<br>n=761 |                | TAHOD<br>n=353 |                 | TAHOD-LITE<br>n=1725 |                 | TAHOD<br>n=149 |                 |
|                                       | n                   | (%)            | n              | (%)             | n                    | (%)             | n              | (%)             |
| <b>Year of ART initiation</b>         |                     |                |                |                 |                      |                 |                |                 |
| 2003-05                               | 12                  | (2)            | 102            | (29)            | 9                    | (1)             | 61             | (41)            |
| 2006-09                               | 163                 | (21)           | 112            | (32)            | 699                  | (41)            | 44             | (30)            |
| 2010-13                               | 586                 | (77)           | 139            | (39)            | 1017                 | (59)            | 44             | (30)            |
| <b>Age</b>                            |                     |                |                |                 |                      |                 |                |                 |
| ≤30                                   | 330                 | (43)           | 145            | (41)            | 295                  | (17)            | 18             | (12)            |
| 31-40                                 | 310                 | (41)           | 134            | (38)            | 492                  | (29)            | 46             | (31)            |
| 41-50                                 | 90                  | (12)           | 58             | (16)            | 474                  | (27)            | 51             | (34)            |
| 51+                                   | 31                  | (4)            | 16             | (5)             | 464                  | (27)            | 34             | (23)            |
| Median [IQR]                          | 31                  | [28, 37]       | 32             | [28, 39]        | 42                   | [34, 51]        | 43             | [36, 50]        |
| <b>Sex</b>                            |                     |                |                |                 |                      |                 |                |                 |
| Male                                  | 489                 | (64)           | 250            | (71)            | 1607                 | (93)            | 118            | (79)            |
| Female                                | 272                 | (36)           | 101            | (29)            | 116                  | (7)             | 31             | (21)            |
| Transgender                           | 0                   | (-)            | 2              | (1)             | 2                    | (<0.1)          | 0              | (-)             |
| <b>Mode of HIV exposure</b>           |                     |                |                |                 |                      |                 |                |                 |
| Heterosexual                          | 636                 | (84)           | 187            | (53)            | 849                  | (49)            | 103            | (69)            |
| Homosexual                            | 42                  | (6)            | 29             | (8)             | 586                  | (34)            | 27             | (18)            |
| Injecting drug user                   | 62                  | (8)            | 98             | (28)            | 60                   | (3)             | 1              | (1)             |
| Other/Unknown                         | 21                  | (3)            | 39             | (11)            | 230                  | (13)            | 18             | (12)            |
| <b>HCV (ever)</b>                     |                     |                |                |                 |                      |                 |                |                 |
| Positive                              | 21                  | (3)            | 49             | (14)            | 74                   | (4)             | 5              | (3)             |
| Negative                              | 268                 | (35)           | 86             | (24)            | 1524                 | (88)            | 130            | (87)            |
| Not tested                            | 472                 | (62)           | 218            | (62)            | 127                  | (8)             | 14             | (10)            |
| <b>HBV (ever)</b>                     |                     |                |                |                 |                      |                 |                |                 |
| Positive                              | 26                  | (3)            | 14             | (4)             | 132                  | (8)             | 15             | (10)            |
| Negative                              | 286                 | (38)           | 129            | (37)            | 1445                 | (84)            | 130            | (87)            |
| Not tested                            | 449                 | (59)           | 210            | (59)            | 148                  | (8)             | 4              | (3)             |
| <b>Pre-ART CD4 (cells/μL)</b>         |                     |                |                |                 |                      |                 |                |                 |
| ≤50                                   | 268                 | (35)           | 147            | (42)            | 536                  | (31)            | 42             | (28)            |
| 51-100                                | 82                  | (11)           | 43             | (12)            | 211                  | (12)            | 12             | (8)             |
| 101-200                               | 92                  | (12)           | 58             | (16)            | 282                  | (16)            | 29             | (19)            |
| >200                                  | 101                 | (13)           | 44             | (12)            | 607                  | (35)            | 53             | (36)            |
| Not tested                            | 218                 | (29)           | 61             | (17)            | 89                   | (5)             | 13             | (9)             |
| Median [IQR]                          | 51                  | [14, 157]      | 50             | [13, 148]       | 126                  | [35, 267]       | 149            | [32, 257]       |
| <b>Pre-ART viral load (copies/mL)</b> |                     |                |                |                 |                      |                 |                |                 |
| ≤10 <sup>5</sup>                      | 2                   | (<0.3)         | 34             | (10)            | 380                  | (22)            | 20             | (13)            |
| >10 <sup>5</sup>                      | 0                   | (-)            | 57             | (16)            | 429                  | (25)            | 31             | (21)            |
| Not tested                            | 759                 | (99)           | 262            | (74)            | 916                  | (53)            | 98             | (66)            |
| Median [IQR]                          | 18850               | [17000, 20700] | 181909         | [60349, 483993] | 117000               | [34292, 387000] | 284500         | [20689, 750001] |
| <b>First ART regimen</b>              |                     |                |                |                 |                      |                 |                |                 |
| NRTI+NNRTI                            | 756                 | (99)           | 352            | (99)            | 1598                 | (93)            | 137            | (92)            |
| NRTI+PI                               | 5                   | (1)            | 1              | (<0.3)          | 105                  | (6)             | 4              | (3)             |
| Other                                 | 0                   | (-)            | 0              | (-)             | 22                   | (1)             | 8              | (5)             |
| <b>Previous mono/dual therapy</b>     |                     |                |                |                 |                      |                 |                |                 |
| No                                    | 756                 | (99)           | 318            | (90)            | 1700                 | (99)            | 121            | (81)            |
| Yes                                   | 5                   | (1)            | 35             | (10)            | 25                   | (1)             | 28             | (19)            |

**Appendix 1. Demographics of the patients by cohort and site.**

|                                       | Vietnam                |                      | Cambodia             |                         |
|---------------------------------------|------------------------|----------------------|----------------------|-------------------------|
|                                       | TAHOD-LITE<br>n=1085   | TAHOD<br>n=526       | TAHOD-LITE<br>n=2073 | TAHOD<br>n=462          |
|                                       | n (%)                  | n (%)                | n (%)                | n (%)                   |
| <b>Year of ART initiation</b>         |                        |                      |                      |                         |
| 2003-05                               | 0 (-)                  | 0 (-)                | 142 (7)              | 183 (40)                |
| 2006-09                               | 0 (-)                  | 0 (-)                | 1034 (50)            | 243 (53)                |
| 2010-13                               | 1089 (100)             | 526 (100)            | 897 (43)             | 36 (8)                  |
| <b>Age</b>                            |                        |                      |                      |                         |
| ≤30                                   | 351 (32)               | 184 (35)             | 588 (28)             | 125 (27)                |
| 31-40                                 | 531 (49)               | 267 (51)             | 935 (45)             | 223 (48)                |
| 41-50                                 | 130 (12)               | 47 (9)               | 395 (19)             | 83 (18)                 |
| 51+                                   | 73 (7)                 | 28 (5)               | 155 (7)              | 31 (7)                  |
| Median [IQR]                          | 32 [28, 37]            | 32 [29, 37]          | 35 [30, 41]          | 35 [30, 40]             |
| <b>Sex</b>                            |                        |                      |                      |                         |
| Male                                  | 676 (62)               | 333 (63)             | 971 (47)             | 245 (53)                |
| Female                                | 409 (38)               | 193 (37)             | 1099 (53)            | 217 (47)                |
| Transgender                           | 0 (-)                  | 0 (-)                | 3 (<0.1)             | 0 (-)                   |
| <b>Mode of HIV exposure</b>           |                        |                      |                      |                         |
| Heterosexual                          | 682 (63)               | 332 (63)             | 1902 (92)            | 457 (99)                |
| Homosexual                            | 15 (1)                 | 1 (<0.2)             | 19 (1)               | 3 (1)                   |
| Injecting drug user                   | 320 (29)               | 151 (29)             | 7 (<0.3)             | 0 (-)                   |
| Other/Unknown                         | 68 (6)                 | 42 (8)               | 145 (7)              | 2 (<0.4)                |
| <b>HCV (ever)</b>                     |                        |                      |                      |                         |
| Positive                              | 411 (38)               | 217 (41)             | 111 (5)              | 26 (6)                  |
| Negative                              | 652 (60)               | 305 (58)             | 1714 (83)            | 424 (92)                |
| Not tested                            | 22 (2)                 | 4 (1)                | 248 (12)             | 12 (2)                  |
| <b>HBV (ever)</b>                     |                        |                      |                      |                         |
| Positive                              | 151 (14)               | 65 (12)              | 189 (9)              | 53 (12)                 |
| Negative                              | 913 (84)               | 458 (87)             | 1657 (80)            | 398 (86)                |
| Not tested                            | 21 (2)                 | 3 (1)                | 227 (11)             | 11 (2)                  |
| <b>Pre-ART CD4 (cells/μL)</b>         |                        |                      |                      |                         |
| ≤50                                   | 391 (36)               | 166 (32)             | 522 (25)             | 145 (31)                |
| 51-100                                | 104 (10)               | 67 (13)              | 273 (13)             | 76 (16)                 |
| 101-200                               | 173 (16)               | 83 (16)              | 448 (22)             | 117 (25)                |
| >200                                  | 331 (31)               | 84 (16)              | 740 (36)             | 118 (26)                |
| Not tested                            | 86 (8)                 | 126 (24)             | 90 (4)               | 6 (1)                   |
| Median [IQR]                          | 101 [30, 222]          | 82 [27, 176]         | 145 [48, 242]        | 106 [35, 207]           |
| <b>Pre-ART viral load (copies/mL)</b> |                        |                      |                      |                         |
| ≤10 <sup>5</sup>                      | 217 (20)               | 14 (3)               | 10 (<0.5)            | 2 (<0.4)                |
| >10 <sup>5</sup>                      | 235 (22)               | 12 (2)               | 3 (<0.1)             | 14 (3)                  |
| Not tested                            | 633 (58)               | 500 (95)             | 2060 (99)            | 446 (97)                |
| Median [IQR]                          | 113000 [32000, 370000] | 31200 [1048, 227000] | 18910 [399, 29300]   | 172000 [135000, 321000] |
| <b>First ART regimen</b>              |                        |                      |                      |                         |
| NRTI+NNRTI                            | 1081 (99)              | 525 (99)             | 2036 (98)            | 454 (98)                |
| NRTI+PI                               | 3 (<0.3)               | 0 (-)                | 27 (1)               | 8 (2)                   |
| Other                                 | 1 (<0.1)               | 1 (<0.2)             | 10 (<0.5)            | 0 (-)                   |
| <b>Previous mono/dual therapy</b>     |                        |                      |                      |                         |
| No                                    | 1061 (98)              | 517 (98)             | 2055 (99)            | 458 (99)                |
| Yes                                   | 24 (2)                 | 9 (2)                | 18 (1)               | 4 (1)                   |

**Appendix 1. Demographics of the patients by cohort and site.**

|                                       | South Korea         |                 |                |                 |
|---------------------------------------|---------------------|-----------------|----------------|-----------------|
|                                       | TAHOD-LITE<br>n=283 |                 | TAHOD<br>n=208 |                 |
|                                       | n                   | (%)             | n              | (%)             |
| <b>Year of ART initiation</b>         |                     |                 |                |                 |
| 2003-05                               | 51                  | (18)            | 65             | (31)            |
| 2006-09                               | 107                 | (38)            | 91             | (44)            |
| 2010-13                               | 125                 | (44)            | 52             | (25)            |
| <b>Age</b>                            |                     |                 |                |                 |
| ≤30                                   | 82                  | (29)            | 56             | (27)            |
| 31-40                                 | 87                  | (31)            | 74             | (36)            |
| 41-50                                 | 56                  | (20)            | 47             | (23)            |
| 51+                                   | 58                  | (20)            | 31             | (15)            |
| Median [IQR]                          | 38                  | [30, 47]        | 37             | [30, 45]        |
| <b>Sex</b>                            |                     |                 |                |                 |
| Male                                  | 264                 | (93)            | 197            | (95)            |
| Female                                | 19                  | (7)             | 11             | (5)             |
| Transgender                           | 0                   | (-)             | 0              | (-)             |
| <b>Mode of HIV exposure</b>           |                     |                 |                |                 |
| Heterosexual                          | 73                  | (26)            | 39             | (19)            |
| Homosexual                            | 115                 | (41)            | 98             | (47)            |
| Injecting drug user                   | 1                   | (<0.4)          | 0              | (-)             |
| Other/Unknown                         | 94                  | (33)            | 71             | (34)            |
| <b>HCV (ever)</b>                     |                     |                 |                |                 |
| Positive                              | 3                   | (1)             | 3              | (2)             |
| Negative                              | 242                 | (86)            | 165            | (79)            |
| Not tested                            | 38                  | (13)            | 40             | (19)            |
| <b>HBV (ever)</b>                     |                     |                 |                |                 |
| Positive                              | 11                  | (4)             | 11             | (5)             |
| Negative                              | 248                 | (88)            | 164            | (79)            |
| Not tested                            | 24                  | (8)             | 33             | (16)            |
| <b>Pre-ART CD4 (cells/μL)</b>         |                     |                 |                |                 |
| ≤50                                   | 38                  | (13)            | 31             | (15)            |
| 51-100                                | 27                  | (10)            | 18             | (9)             |
| 101-200                               | 57                  | (20)            | 36             | (17)            |
| >200                                  | 134                 | (47)            | 107            | (51)            |
| Not tested                            | 27                  | (10)            | 16             | (8)             |
| Median [IQR]                          | 212                 | [98, 313]       | 217            | [99, 292]       |
| <b>Pre-ART viral load (copies/mL)</b> |                     |                 |                |                 |
| ≤10 <sup>5</sup>                      | 142                 | (50)            | 121            | (58)            |
| >10 <sup>5</sup>                      | 97                  | (34)            | 65             | (31)            |
| Not tested                            | 44                  | (16)            | 22             | (11)            |
| Median [IQR]                          | 66500               | [16500, 274000] | 45000          | [12942, 200000] |
| <b>First ART regimen</b>              |                     |                 |                |                 |
| NRTI+NNRTI                            | 117                 | (41)            | 75             | (36)            |
| NRTI+PI                               | 132                 | (47)            | 124            | (60)            |
| Other                                 | 34                  | (12)            | 9              | (4)             |
| <b>Previous mono/dual therapy</b>     |                     |                 |                |                 |
| No                                    | 281                 | (99)            | 201            | (97)            |
| Yes                                   | 2                   | (1)             | 7              | (3)             |
